# Supplementary material for: Longer Duration of Active Oil Biosynthesis during Seed Development Is Crucial for High Oil Yield—Lessons from Genome-Wide In Silico Mining and RNA-Seq Validation in Sesame
Source: MDPI journal article supplement (doi:10.3390/plants11212980), 2022-11-04
Supplement: s1 [file s1]

**Table S1. List of gene products used in this study for in silico analysis**

| Subfamily | Gene ID          | NCBI Accession Number | Botanical name                   |
|-----------|------------------|-----------------------|----------------------------------|
| ACCase    | <i>SiaccB1</i>   | XP_011077154.1        | <i>Sesamum indicum</i> (2x)      |
|           | <i>SiaccB2</i>   | XP_011072841.1        | <i>Sesamum indicum</i> (2x)      |
|           | <i>SiaccC</i>    | XP_011070473.1        | <i>Sesamum indicum</i> (2x)      |
|           | <i>SiaccA-1</i>  | XP_011077598.1        | <i>Sesamum indicum</i> (2x)      |
|           | <i>SiaccA-2</i>  | XP_020551382.1        | <i>Sesamum indicum</i> (2x)      |
|           | <i>SiaccA-3</i>  | XP_011094964.1        | <i>Sesamum indicum</i> (2x)      |
|           | <i>SiaccD</i>    | YP_004935675.1        | <i>Sesamum indicum</i> (2x)      |
|           | <i>BnaccB1</i>   | XP_013649844.1        | <i>Brassica napus</i> (4x)       |
|           | <i>BnaccB2</i>   | XP_013728269.1        | <i>Brassica napus</i> (4x)       |
|           | <i>GhaccB</i>    | ABU41516.1            | <i>Gossypium hirsutum</i> (4x)   |
|           | <i>BnaccC</i>    | ADI79335.1            | <i>Brassica napus</i> (4x)       |
|           | <i>BnaccA</i>    | ACN65504.1            | <i>Brassica napus</i> (4x)       |
|           | <i>BnaccA2</i>   | ACT83681.1            | <i>Brassica napus</i> (4x)       |
|           | <i>BnaccD</i>    | CAA90747.1            | <i>Brassica napus</i> (4x)       |
|           | <i>GmaaccB2</i>  | AAG44776.1            | <i>Glycine max</i> (2x)          |
|           | <i>GmaaccB1</i>  | NP_001238375.1        | <i>Glycine max</i> (2x)          |
|           | <i>GmaccA-1</i>  | AAF80496.1            | <i>Glycine max</i> (2x)          |
|           | <i>GmaccA-3</i>  | AAF89549.1            | <i>Glycine max</i> (2x)          |
|           | <i>GmaccD</i>    | AAA80643.1            | <i>Glycine max</i> (2x)          |
|           | <i>AhaccB1</i>   | XP_025649626.1        | <i>Arachis hypogaea</i> (4x)     |
|           | <i>AhaccB2</i>   | XP_025681786.1        | <i>Arachis hypogaea</i> (4x)     |
|           | <i>AhaccB1-1</i> | ACO53609.1            | <i>Arachis hypogaea</i> (4x)     |
|           | <i>AhaccB2-1</i> | ACO53611.1            | <i>Arachis hypogaea</i> (4x)     |
|           | <i>AhaccC2</i>   | XP_025636875.1        | <i>Arachis hypogaea</i> (4x)     |
|           | <i>AhaccC1</i>   | XP_025700754.1        | <i>Arachis hypogaea</i> (4x)     |
|           | <i>AhaccC4</i>   | ACO53619.1            | <i>Arachis hypogaea</i> (4x)     |
|           | <i>AhaccC3</i>   | ACO53618.1            | <i>Arachis hypogaea</i> (4x)     |
|           | <i>AhaccA-1</i>  | XP_025695444.1        | <i>Arachis hypogaea</i> (4x)     |
|           | <i>AhaccA-2</i>  | XP_025649321.1        | <i>Arachis hypogaea</i> (4x)     |
|           | <i>AhaccD</i>    | ACO53622.1            | <i>Arachis hypogaea</i> (4x)     |
|           | <i>HaaccC</i>    | XP_021986207.1        | <i>Helianthus annuus</i> (2x)    |
|           | <i>HaaccA-1</i>  | QGZ98789.1            | <i>Helianthus annuus</i> (2x)    |
|           | <i>HaaccA-2</i>  | XP_022010319.1        | <i>Helianthus annuus</i> (2x)    |
|           | <i>CoaccC</i>    | ACS14663.1            | <i>Camellia oleifera</i> (4x)    |
|           | <i>AtaccB1</i>   | AAC49114.1            | <i>Arabidopsis thaliana</i> (2x) |
|           | <i>AtaccB2</i>   | NP_568316.1           | <i>Arabidopsis thaliana</i> (2x) |
|           | <i>AtaccC</i>    | NP_198386.1           | <i>Arabidopsis thaliana</i> (2x) |
|           | <i>AtaccA</i>    | BAD93727.1            | <i>Arabidopsis thaliana</i> (2x) |
|           | <i>AtaccD</i>    | NP_051068.1           | <i>Arabidopsis thaliana</i> (2x) |
|           | <i>NtaccD</i>    | CAA77362.1            | <i>Nicotiana tabacum</i> (2x)    |
| MCAT      | <i>SiFabD</i>    | XP_011080770.1        | <i>Sesamum indicum</i> (2x)      |
|           | <i>AhFabD1-1</i> | ACJ07137.1            | <i>Arachis hypogaea</i> (4x)     |
|           | <i>AhFabD1-2</i> | ACJ07138.1            | <i>Arachis hypogaea</i> (4x)     |
|           | <i>GmFabD</i>    | NP_001238312.2        | <i>Glycine max</i> (2x)          |

|                          |          |                |                                  |
|--------------------------|----------|----------------|----------------------------------|
|                          | AtFabD   | CAA0373481.1   | <i>Arabidopsis thaliana</i> (2x) |
| <b>KASIII</b>            | SiFabH-1 | XP_011069912   | <i>Sesamum indicum</i> (2x)      |
|                          | SiFabH-2 | XP_011079297   | <i>Sesamum indicum</i> (2x)      |
|                          | AhFabH   | XP_025611200.1 | <i>Arachis hypogaea</i> (4x)     |
|                          | GmFabH   | NP_001237735.1 | <i>Glycine max</i> (2x)          |
|                          | BnFabH   | XP_013732147.1 | <i>Brassica napus</i> (4x)       |
|                          | AtFabH-1 | OAP12004.1     | <i>Arabidopsis thaliana</i> (2x) |
|                          | AtFabH-2 | CAA72385.1     | <i>Arabidopsis thaliana</i> (2x) |
| <b>KASI</b>              | SiFabB-1 | XP_011085258   | <i>Sesamum indicum</i> (2x)      |
|                          | SiFabB-2 | XP_011096538   | <i>Sesamum indicum</i> (2x)      |
|                          | SiFabB-3 | XP_011082304   | <i>Sesamum indicum</i> (2x)      |
|                          | GmFabB-1 | XP_006584769.1 | <i>Glycine max</i> (2x)          |
|                          | GmFabB-2 | NP_001238610.1 | <i>Glycine max</i> (2x)          |
|                          | BnFabB   | XP_013662893.1 | <i>Brassica napus</i> (2x)       |
|                          | HaFabB-1 | XP_022025436.1 | <i>Helianthus annuus</i> (2x)    |
|                          | HaFabB-2 | ABM53471.1     | <i>Helianthus annuus</i> (2x)    |
|                          | AhFabB   | XP_025639780.1 | <i>Arachis hypogaea</i> (4x)     |
|                          | NtFabB   | KX033513       | <i>Nicotiana tabacum</i> (2x)    |
|                          | AtFabB-1 | NP_199441.1    | <i>Arabidopsis thaliana</i> (2x) |
| <b>KASII</b>             | SiFabF-1 | XP_011093876   | <i>Sesamum indicum</i> (2x)      |
|                          | SiFabF-2 | XP_011078136   | <i>Sesamum indicum</i> (2x)      |
|                          | SiFabF-3 | XP_011072620   | <i>Sesamum indicum</i> (2x)      |
|                          | HaFabF-1 | XP_022013627.1 | <i>Helianthus annuus</i> (2x)    |
|                          | HaFabF-2 | ABI18155.1     | <i>Helianthus annuus</i> (2x)    |
|                          | AhFabF-1 | XP_025644592.1 | <i>Arachis hypogaea</i> (4x)     |
|                          | AhFabF-2 | XP_025645142.1 | <i>Arachis hypogaea</i> (4x)     |
|                          | JiFabF   | DQ987700       | <i>Jatropha curcas</i> (2x)      |
|                          | GmFabF   | AAF61737.1     | <i>Glycine max</i> (2x)          |
| <b>KAS Mitochondrion</b> | SiKASmt  | XP_011077001   | <i>Sesamum indicum</i> (2x)      |
|                          | AhKASmt  | XP_025632626.1 | <i>Arachis hypogaea</i> (4x)     |
| <b>SAD</b>               | SiSAD1   | NP_001291335.1 | <i>Sesamum indicum</i> (2x)      |
|                          | SiSAD2   | XP_011091536.1 | <i>Sesamum indicum</i> (2x)      |
|                          | SiSAD3   | XP_011084689.1 | <i>Sesamum indicum</i> (2x)      |
|                          | SiSAD4   | XP_011077116.1 | <i>Sesamum indicum</i> (2x)      |
|                          | SiSAD5   | XP_011074783.1 | <i>Sesamum indicum</i> (2x)      |
|                          | SiSAD6   | XP_011100275.1 | <i>Sesamum indicum</i> (2x)      |
|                          | SiSAD7   | XP_011100276.1 | <i>Sesamum indicum</i> (2x)      |
|                          | BrSAD1   | XP_009133630.1 | <i>Brassica rapa</i> (2x)        |
|                          | BrSAD2   | XP_009142970.1 | <i>Brassica rapa</i> (2x)        |
|                          | BrSAD3A  | XP_018513314.1 | <i>Brassica rapa</i> (2x)        |
|                          | BrSAD4   | XP_009118393.2 | <i>Brassica rapa</i> (2x)        |
|                          | BrSAD5   | XP_009121502.1 | <i>Brassica rapa</i> (2x)        |
|                          | BrSAD6   | XP_009147347.1 | <i>Brassica rapa</i> (2x)        |
|                          | BrSAD7   | XP_009121503.1 | <i>Brassica rapa</i> (2x)        |
|                          | RcSAD1   | NP_001310659.1 | <i>Ricinus communis</i> (2x)     |
|                          | AhSAD1   | ACI45450.1     | <i>Arachis hypogaea</i> (4x)     |
|                          | AhSAD2   | AID51207.1     | <i>Arachis hypogaea</i> (4x)     |
|                          | AhSAD3   | AID51208.1     | <i>Arachis hypogaea</i> (4x)     |

|             |                  |                |                                    |
|-------------|------------------|----------------|------------------------------------|
|             | <i>AtFAB2</i>    | AT2G43710.1    | <i>Arabidopsis thaliana</i> (2x)   |
|             | <i>AtAAD2</i>    | AT3G02610.1    | <i>Arabidopsis thaliana</i> (2x)   |
|             | <i>AtAAD3</i>    | AT5G16230.1    | <i>Arabidopsis thaliana</i> (2x)   |
|             | <i>AtSAD4</i>    | AT3G02620.1    | <i>Arabidopsis thaliana</i> (2x)   |
|             | <i>AtSAD5</i>    | AT3G02630.1    | <i>Arabidopsis thaliana</i> (2x)   |
|             | <i>AtSAD6</i>    | AT5G16240.1    | <i>Arabidopsis thaliana</i> (2x)   |
|             | <i>AtSAD7</i>    | AT1G43800.1    | <i>Arabidopsis thaliana</i> (2x)   |
|             | <i>Muc-PAD</i>   | AAC05293.1     | <i>Macfadyena unguis-cati</i> (2x) |
| <b>FatB</b> | <i>SiFatB1-1</i> | XP_011073093.1 | <i>Sesamum indicum</i> (2x)        |
|             | <i>SiFatB1-2</i> | XP_011078334.1 | <i>Sesamum indicum</i> (2x)        |
|             | <i>HaFatB</i>    | CAC80370.1     | <i>Helianthus annuus</i> (2x)      |
|             | <i>AhFatB</i>    | ABO38555.1     | <i>Arachis hypogaea</i> (4x)       |
|             | <i>HaFatB-1</i>  | XP_022024086.1 | <i>Helianthus annuus</i> (2x)      |
|             | <i>HaFatB-2</i>  | XP_021989855.1 | <i>Helianthus annuus</i> (2x)      |
| <b>FatA</b> | <i>SiFatA</i>    | XP_011089673.1 | <i>Sesamum indicum</i> (2x)        |
|             | <i>CsFatA-1</i>  | AFQ60948.1     | <i>Camelina sativa</i> (6x)        |
|             | <i>CsFatA-2</i>  | AFQ60947.1     | <i>Camelina sativa</i> (6x)        |
|             | <i>CsFatA-3</i>  | AFQ60948.1     | <i>Camelina sativa</i> (6x)        |
|             | <i>GmFatA</i>    | XP_006602508.1 | <i>Glycine max</i> (2x)            |
|             | <i>RcFatA</i>    | NP_001310680.1 | <i>Ricinus communis</i> (2x)       |
|             | <i>AtFatA-1</i>  | NP_189147.1    | <i>Arabidopsis thaliana</i> (2x)   |
|             | <i>AtFatA-2</i>  | NP_193041.1    | <i>Arabidopsis thaliana</i> (2x)   |
| <b>FAD</b>  | <i>SiFAD2-1</i>  | AAX11454.1     | <i>Sesamum indicum</i> (2x)        |
|             | <i>SiFAD2-2</i>  | XP_011075145.1 | <i>Sesamum indicum</i> (2x)        |
|             | <i>SiFAD3</i>    | XP_011080789.1 | <i>Sesamum indicum</i> (2x)        |
|             | <i>SiFAD6</i>    | XP_011079423.1 | <i>Sesamum indicum</i> (2x)        |
|             | <i>SiFAD7</i>    | NP_001306619.1 | <i>Sesamum indicum</i> (2x)        |
|             | <i>SiFAD8</i>    | XP_011076709.1 | <i>Sesamum indicum</i> (2x)        |
|             | <i>AhFAD2-1A</i> | AAB84262.1     | <i>Arachis hypogaea</i> (4x)       |
|             | <i>AhFAD2-1B</i> | AAF82293.1     | <i>Arachis hypogaea</i> (4x)       |
|             | <i>AhFAD2-2</i>  | ACZ06072.1     | <i>Arachis hypogaea</i> (4x)       |
|             | <i>AhFAD3-4</i>  | QFR98376.1     | <i>Arachis hypogaea</i> (4x)       |
|             | <i>AhFAD6</i>    | ACZ06070.1     | <i>Arachis hypogaea</i> (4x)       |
|             | <i>AhFAD7-1A</i> | AID51460.1     | <i>Arachis hypogaea</i> (4x)       |
|             | <i>AhFAD8</i>    | AFD93985.1     | <i>Arachis hypogaea</i> (4x)       |
|             | <i>GmFAD2-1A</i> | AAX29989.1     | <i>Glycine max</i> (2x)            |
|             | <i>GmFAD2-2</i>  | BAD89862.1     | <i>Glycine max</i> (2x)            |
|             | <i>GmFAD3A</i>   | AMY60543.1     | <i>Glycine max</i> (2x)            |
|             | <i>GmFAD6</i>    | P48628.1       | <i>Glycine max</i> (2x)            |
|             | <i>GmFAD7</i>    | ACF19424.1     | <i>Glycine max</i> (2x)            |
|             | <i>GmFAD8-2</i>  | NP_001239777.1 | <i>Glycine max</i> (2x)            |
|             | <i>CsFAD2</i>    | XP_019096117.1 | <i>Camelina sativa</i> (6x)        |
|             | <i>CsFAD2-2</i>  | NP_001291954.1 | <i>Camelina sativa</i> (6x)        |
|             | <i>BnFAD2-4</i>  | XP_022570693.1 | <i>Brassica napus</i> (4x)         |
|             | <i>BnFAD3</i>    | NP_001302953.1 | <i>Brassica napus</i> (4x)         |
|             | <i>BnFAD6</i>    | AAA50157.1     | <i>Brassica napus</i> (4x)         |
|             | <i>HaFAD2</i>    | XP_021972383.1 | <i>Helianthus annuus</i> (2x)      |
|             | <i>AtFAD2</i>    | NP_187819.1    | <i>Arabidopsis thaliana</i> (2x)   |

|      |          |                |                                  |
|------|----------|----------------|----------------------------------|
|      | AtFAD3   | AAA61778.1     | <i>Arabidopsis thaliana</i> (2x) |
|      | AtFAD6   | NP_194824.1    | <i>Arabidopsis thaliana</i> (2x) |
|      | AtFAD8   | AAA65621.1     | <i>Arabidopsis thaliana</i> (2x) |
|      | AtFAD7   | NP_187727.1    | <i>Arabidopsis thaliana</i> (2x) |
| LACS | SiLACS1  | XP_011079524.1 | <i>Sesamum indicum</i> (2x)      |
|      | SiLACS2  | XP_011088325.1 | <i>Sesamum indicum</i> (2x)      |
|      | SiLACS4  | XP_011101042.1 | <i>Sesamum indicum</i> (2x)      |
|      | SiLACS6  | XP_011090746.1 | <i>Sesamum indicum</i> (2x)      |
|      | SiLACS8  | XP_011085413.1 | <i>Sesamum indicum</i> (2x)      |
|      | SiLACS9  | XP_011069534.1 | <i>Sesamum indicum</i> (2x)      |
|      | BnLACS1  | CDY27501.1     | <i>Brassica napus</i> (4x)       |
|      | BnLACS2  | CDY29350.1     | <i>Brassica napus</i> (4x)       |
|      | BnLACS3  | XP_013664517.1 | <i>Brassica napus</i> (4x)       |
|      | BnLACS4  | NP_001302548.1 | <i>Brassica napus</i> (4x)       |
|      | BnLACS5  | XP_013669542.1 | <i>Brassica napus</i> (4x)       |
|      | BnLACS9  | NP_001303207.1 | <i>Brassica napus</i> (4x)       |
|      | AtLACS1  | BAH19991.1     | <i>Arabidopsis thaliana</i> (2x) |
|      | AtLACS2  | AT1G49430      | <i>Arabidopsis thaliana</i> (2x) |
|      | AtLACS3  | AT1G64400      | <i>Arabidopsis thaliana</i> (2x) |
|      | AtLACS4  | AT4G23850      | <i>Arabidopsis thaliana</i> (2x) |
|      | AtLACS5  | AAM28872.1     | <i>Arabidopsis thaliana</i> (2x) |
|      | AtLACS6  | NP_566265.1    | <i>Arabidopsis thaliana</i> (2x) |
|      | AtLACS7  | NP_198112.2    | <i>Arabidopsis thaliana</i> (2x) |
|      | AtLACS8  | AT2G04350      | <i>Arabidopsis thaliana</i> (2x) |
|      | AtLACS9  | AT1G77590      | <i>Arabidopsis thaliana</i> (2x) |
| GPAT | SiGPAT1  | XP_011069706.1 | <i>Sesamum indicum</i> (2x)      |
|      | SiGPAT2  | XP_011082911.1 | <i>Sesamum indicum</i> (2x)      |
|      | SiGPAT3  | XP_011094070.1 | <i>Sesamum indicum</i> (2x)      |
|      | SiGPAT4  | XP_011077903.1 | <i>Sesamum indicum</i> (2x)      |
|      | SiGPAT5  | XP_011088689.1 | <i>Sesamum indicum</i> (2x)      |
|      | SiGPAT6  | XP_011092934.1 | <i>Sesamum indicum</i> (2x)      |
|      | SiGPAT7  | XP_011094147.2 | <i>Sesamum indicum</i> (2x)      |
|      | SiGPAT8  | XP_011085137.1 | <i>Sesamum indicum</i> (2x)      |
|      | SiGPAT9  | XP_011076807.1 | <i>Sesamum indicum</i> (2x)      |
|      | SiGPAT10 | XP_011073520.1 | <i>Sesamum indicum</i> (2x)      |
|      | SiGPAT11 | XP_011086432.1 | <i>Sesamum indicum</i> (2x)      |
|      | SiGPAT12 | XP_011091226.1 | <i>Sesamum indicum</i> (2x)      |
|      | SiGPAT13 | XP_011092551.1 | <i>Sesamum indicum</i> (2x)      |
|      | SiGPAT14 | XP_011093132.1 | <i>Sesamum indicum</i> (2x)      |
|      | SiGPAT15 | XP_011077573.2 | <i>Sesamum indicum</i> (2x)      |
|      | SiGPAT16 | XP_011094988.1 | <i>Sesamum indicum</i> (2x)      |
|      | SiGPAT17 | XP_011098557.1 | <i>Sesamum indicum</i> (2x)      |
|      | BnGPAT1  | XP_013696751.1 | <i>Brassica napus</i> (4x)       |
|      | BnGPAT2  | CDY15240.1     | <i>Brassica napus</i> (4x)       |
|      | BnGPAT3  | CDY22016.1     | <i>Brassica napus</i> (4x)       |
|      | AhGPAT1  | AER51964.1     | <i>Arachis hypogaea</i> (4x)     |
|      | AhGPAT2  | AER42344.1     | <i>Arachis hypogaea</i> (4x)     |
|      | AhGPAT6  | AER42345.1     | <i>Arachis hypogaea</i> (4x)     |

|              |            |                |                                  |
|--------------|------------|----------------|----------------------------------|
|              | AhGPAT4    | AGR66149.1     | <i>Arachis hypogaea</i> (4x)     |
|              | AhGPAT9    | AGR66148.1     | <i>Arachis hypogaea</i> (4x)     |
|              | AtATS1     | AT1G32200      | <i>Arabidopsis thaliana</i> (2x) |
|              | AtGPAT1    | NP_563768.1    | <i>Arabidopsis thaliana</i> (2x) |
|              | AtGPAT2    | AT1G02390      | <i>Arabidopsis thaliana</i> (2x) |
|              | AtGPAT3    | AT4G01950      | <i>Arabidopsis thaliana</i> (2x) |
|              | AtGPAT4    | AT1G01610      | <i>Arabidopsis thaliana</i> (2x) |
|              | AtGPAT5    | NP_187750.1    | <i>Arabidopsis thaliana</i> (2x) |
|              | AtGPAT6    | NP_181346.1    | <i>Arabidopsis thaliana</i> (2x) |
|              | AtGPAT7    | NP_196227.1    | <i>Arabidopsis thaliana</i> (2x) |
|              | AtGPAT8    | NP_191950.2    | <i>Arabidopsis thaliana</i> (2x) |
|              | AtGPAT9    | AT5G60620      | <i>Arabidopsis thaliana</i> (2x) |
| <b>LPAAT</b> | SiLPAAT1   | XP_011084281.2 | <i>Sesamum indicum</i> (2x)      |
|              | SiLPAAT2-1 | XP_011075205.1 | <i>Sesamum indicum</i> (2x)      |
|              | SiLPAAT2-2 | XP_011078878.1 | <i>Sesamum indicum</i> (2x)      |
|              | SiLPAAT3   | XP_011080283.1 | <i>Sesamum indicum</i> (2x)      |
|              | SiLPAAT4   | XP_011074489.1 | <i>Sesamum indicum</i> (2x)      |
|              | SiLPAAT5   | XP_011088344.1 | <i>Sesamum indicum</i> (2x)      |
|              | SiLPAATB   | XP_020554192.1 | <i>Sesamum indicum</i> (2x)      |
|              | BnLPAAT1   | Q9LLY4.2       | <i>Brassica napus</i> (4x)       |
|              | BnLPAAT2-1 | Q9XFW4.1       | <i>Brassica napus</i> (4x)       |
|              | BnLPAAT2-2 | NP_001302981.1 | <i>Brassica napus</i> (4x)       |
|              | BnLPAAT2-3 | AXX75484.1     | <i>Brassica napus</i> (4x)       |
|              | BnLPAAT2-4 | NP_001302955.1 | <i>Brassica napus</i> (4x)       |
|              | AhLPAAT2   | XP_025604428.1 | <i>Arachis hypogaea</i> (4x)     |
|              | BnLPAAT3   | XP_013749364.1 | <i>Brassica napus</i> (4x)       |
|              | BnLPAAT4-1 | AHV90568.1     | <i>Brassica napus</i> (4x)       |
|              | BnLPAAT4-2 | AHV90569.1     | <i>Brassica napus</i> (4x)       |
|              | RcLPAATB   | AFR42414.1     | <i>Ricinus communis</i> (2x)     |
|              | AhLPAATB   | AGT57763.1     | <i>Arachis hypogaea</i> (4x)     |
|              | AtLPAAT1   | NP_194787.2    | <i>Arabidopsis thaliana</i> (2x) |
|              | AtLPAAT2   | ABG48392.1     | <i>Arabidopsis thaliana</i> (2x) |
|              | AtLPAAT3   | AT1G51260      | <i>Arabidopsis thaliana</i> (2x) |
|              | AtLPAAT4   | AT1G75020      | <i>Arabidopsis thaliana</i> (2x) |
|              | AtLPAAT5   | AT3G18850      | <i>Arabidopsis thaliana</i> (2x) |
| <b>PAH</b>   | SiPAH1-1   | XP_011077414.2 | <i>Sesamum indicum</i> (2x)      |
|              | SiPAH1-2   | XP_011094787.1 | <i>Sesamum indicum</i> (2x)      |
|              | SiPAH2     | XP_020550995.1 | <i>Sesamum indicum</i> (2x)      |
|              | BnPAH1-1   | XP_013750374.1 | <i>Brassica napus</i> (4x)       |
|              | BnPAH2     | XP_013644973.1 | <i>Brassica napus</i> (4x)       |
|              | BnPAH1-2   | CDY41298.1     | <i>Brassica napus</i> (4x)       |
|              | AhPAH1-1   | XP_025605008.1 | <i>Arachis hypogaea</i> (4x)     |
|              | AhPAH2-1   | QHN88458.1     | <i>Arachis hypogaea</i> (4x)     |
|              | AhPAH2-2   | QHO29627.1     | <i>Arachis hypogaea</i> (4x)     |
|              | GmPAH1     | XP_003541397.1 | <i>Glycine max</i> (2x)          |
|              | GmPAH2     | XP_006578018.1 | <i>Glycine max</i> (2x)          |
|              | AtPAH1     | AT3G09560      | <i>Arabidopsis thaliana</i> (2x) |
|              | AtPAH2     | AT5G42870      | <i>Arabidopsis thaliana</i> (2x) |



|             |                   |                |                                        |
|-------------|-------------------|----------------|----------------------------------------|
| <b>DGAT</b> | <i>Si</i> DGAT1-1 | NP_001291334.1 | <i>Sesamum indicum</i> (2x)            |
|             | <i>Si</i> DGAT2D  | XP_011098009.1 | <i>Sesamum indicum</i> (2x)            |
|             | <i>Si</i> DGAT3   | XP_011086024.1 | <i>Sesamum indicum</i> (2x)            |
|             | <i>Ah</i> DGAT1c  | XP_025688510.1 | <i>Arachis hypogaea</i> (4x)           |
|             | <i>Ah</i> DGAT1-3 | ATG83402.1     | <i>Arachis hypogaea</i> (4x)           |
|             | <i>Gm</i> DGAT1A  | NP_001237289.1 | <i>Glycine max</i> (2x)                |
|             | <i>Oe</i> DGAT1   | AAS01606.1     | <i>Olea europaea</i> (2x)              |
|             | <i>Cs</i> DGAT1B  | AQU71886.1     | <i>Camelina sativa</i> (6x)            |
|             | <i>Ah</i> DGAT2   | AEO11788.1     | <i>Arachis hypogaea</i> (4x)           |
|             | <i>Ah</i> DGAT2D  | XP_025682671.1 | <i>Arachis hypogaea</i> (4x)           |
|             | <i>Ah</i> DGAT2-1 | AEO11791.1     | <i>Arachis hypogaea</i> (4x)           |
|             | <i>Gm</i> DGAT2D  | BCB92186.1     | <i>Glycine max</i> (2x)                |
|             | <i>Oe</i> DGAT2   | ADG22608.1     | <i>Olea europaea</i> (2x)              |
|             | <i>Eg</i> DGAT2   | XP_010932136.1 | <i>Elaeis guineensis</i> (2x)          |
|             | <i>Bn</i> DGAT2D  | AKR16145.1     | <i>Brassica napus</i> (4x)             |
|             | <i>Ah</i> DGAT3-3 | AAX62735.1     | <i>Arachis hypogaea</i> (4x)           |
|             | <i>Ah</i> DGAT3-1 | ABW34442.1     | <i>Arachis hypogaea</i> (4x)           |
|             | <i>Ah</i> DGAT3-3 | AAX62735.1     | <i>Arachis hypogaea</i> (4x)           |
|             | <i>Gm</i> DGAT3   | XP_003542403.1 | <i>Glycine max</i> (2x)                |
|             | <i>Cs</i> DGAT3-1 | XP_010479249.2 | <i>Camelina sativa</i> (6x)            |
|             | <i>Cs</i> DGAT3-2 | XP_010461643.1 | <i>Camelina sativa</i> (6x)            |
|             | <i>Cs</i> DGAT3-3 | XP_010500353.1 | <i>Camelina sativa</i> (6x)            |
|             | <i>Bn</i> DGAT1   | AAD45536.1     | <i>Brassica napus</i> (4x)             |
|             | <i>At</i> DGAT1   | AAF19262.1     | <i>Arabidopsis thaliana</i> (2x)       |
|             | <i>At</i> DGAT2   | NP_566952.1    | <i>Arabidopsis thaliana</i> (2x)       |
|             | <i>At</i> DGAT3   | OAP16619.1     | <i>Arabidopsis thaliana</i> (2x)       |
|             | <i>Tm</i> DGAT1   | AAM03340.2     | <i>Tropaeolum majus</i> (2x)           |
|             | <i>Jr</i> DGAT3   | XP_018840223.2 | <i>Juglans regia</i> (2x)              |
|             | <i>Pf</i> DGAT1   | AAG23696.1     | <i>Perilla frutescens</i> (4x)         |
|             | <i>Sa</i> DGAT1   | GER56917.1     | <i>Striga asiatica</i> (2x)            |
|             | <i>Sh</i> DGAT2   | AXN76729.1     | <i>Salvia hispanica</i> (2x)           |
|             | <i>Hi</i> DGAT2   | PIN08318.1     | <i>Handroanthus impetiginosus</i> (2x) |
