# Supplementary material for: Longer Duration of Active Oil Biosynthesis during Seed Development Is Crucial for High Oil Yield—Lessons from Genome-Wide In Silico Mining and RNA-Seq Validation in Sesame
Source: MDPI journal article supplement (doi:10.3390/plants11212980), 2022-11-04
Supplement: s1 [file s1]

**Table S2.** Computed physico-chemical properties for gene products associated with oil biosynthetic pathway in sesame (*Sesamum indicum*).

| Protein family | Protein name    | Linkage group | Length (aa) | Mol. Wt. (kDa) | Theoretical pI | Grand average of hydropathicity (GRAVY) | Instability index (II) | Stable yes/no | Aliphatic index | Subcellular location   | Transit peptide length | Subunit     |
|----------------|-----------------|---------------|-------------|----------------|----------------|-----------------------------------------|------------------------|---------------|-----------------|------------------------|------------------------|-------------|
| ACCase         | <i>SiaccB-1</i> | LG4           | 280         | 29.49          | 8.86           | -0.14                                   | 60.71                  | No            | 84.75           | plastid, soluble       | 65                     | Heteromeric |
|                | <i>SiaccB-2</i> | LG3           | 271         | 29.06          | 6.89           | -0.19                                   | 65.69                  | No            | 82.44           | plastid, soluble       | 63                     |             |
|                | <i>SiaccC</i>   | LG2           | 535         | 58.53          | 6.88           | -0.22                                   | 35.65                  | Yes           | 83.16           | plastid, soluble       | 48                     |             |
|                | <i>SiaccA-1</i> | LG5           | 758         | 84.42          | 8.28           | -0.54                                   | 37.88                  | Yes           | 82.90           | plastid, membrane      | 57                     |             |
|                | <i>SiaccA-2</i> | LG1           | 735         | 82.60          | 9.25           | -0.55                                   | 33.98                  | Yes           | 87.25           | plastid, membrane      | -                      |             |
|                | <i>SiaccA-3</i> | LG11          | 757         | 83.81          | 8.93           | -0.46                                   | 39.54                  | Yes           | 87.65           | plastid, membrane      | 55                     |             |
|                | <i>SiaccD</i>   | cp            | 509         | 57.64          | 5.04           | -0.49                                   | 51.03                  | No            | 72.20           | cytoplasm, soluble     | -                      |             |
| MCAT           | <i>SiFabD</i>   | LG6           | 408         | 43.36          | 8.88           | 0.11                                    | 36.94                  | Yes           | 99.02           | plastid, soluble       | 83                     | Monomer     |
| KASIII         | <i>SiFabH-1</i> | LG2           | 401         | 42.42          | 6.54           | 0.01                                    | 38.62                  | Yes           | 96.86           | plastid, membrane      | 72                     | Homodimer   |
|                | <i>SiFabH-2</i> | LG5           | 400         | 42.28          | 6.54           | -0.02                                   | 37.40                  | Yes           | 90.53           | plastid, membrane      | 62                     |             |
| KASI           | <i>SiFabB-1</i> | LG8           | 471         | 50.28          | 8.03           | -0.11                                   | 36.44                  | Yes           | 84.56           | plastid, soluble       | 43                     | Homodimer   |
|                | <i>SiFabB-2</i> | LG12          | 472         | 50.14          | 7.57           | -0.11                                   | 34.45                  | Yes           | 83.77           | plastid, soluble       | 45                     |             |
|                | <i>SiFabB-3</i> | LG6           | 493         | 52.19          | 8.37           | -0.05                                   | 27.79                  | Yes           | 84.12           | plastid, soluble       | 38                     |             |
| KASII          | <i>SiFabF-1</i> | LG11          | 547         | 59.00          | 8.26           | -0.08                                   | 47.28                  | No            | 76.97           | plastid, soluble       | 49                     | Homodimer   |
|                | <i>SiFabF-2</i> | LG5           | 546         | 58.74          | 7.48           | -0.02                                   | 47.13                  | No            | 79.05           | plastid, soluble       | 51                     |             |
|                | <i>SiFabF-3</i> | LG3           | 567         | 60.54          | 7.96           | 0.02                                    | 42.75                  | No            | 84.53           | plastid, soluble       | 54                     |             |
| mtKAS          | <i>SimtKAS</i>  | LG4           | 470         | 49.96          | 7.20           | -0.003                                  | 36.61                  | Yes           | 83.55           | mitochondrion, soluble | 22                     | Homodimer   |
| SAD            | <i>SiSAD-1</i>  | LG3           | 397         | 45.0           | 6.43           | -0.48                                   | 38.50                  | Yes           | 77.85           | plastid, soluble       | 33                     | Homodimer   |

|      |                   |      |     |       |      |       |       |     |       |                         |    |           |
|------|-------------------|------|-----|-------|------|-------|-------|-----|-------|-------------------------|----|-----------|
|      | <i>SiSAD-2</i>    | LG10 | 399 | 45.5  | 6.04 | -0.47 | 35.82 | Yes | 77.96 | plastid, soluble        | 33 |           |
|      | <i>SiSAD-3</i>    | LG7  | 391 | 44.6  | 6.14 | -0.43 | 41.35 | No  | 81.05 | plastid, soluble        | 24 |           |
|      | <i>SiSAD-4</i>    | LG4  | 391 | 44.4  | 6.38 | -0.45 | 34.49 | Yes | 81.31 | plastid, soluble        | 24 |           |
|      | <i>SiSAD-5</i>    | LG3  | 384 | 43.0  | 6.18 | -0.40 | 32.51 | Yes | 78.22 | plastid, soluble        | 31 |           |
|      | <i>SiSAD-6</i>    | LG16 | 383 | 43.7  | 5.98 | -0.33 | 44.51 | No  | 83.22 | plastid, soluble        | 28 |           |
|      | <i>SiSAD-7</i>    | LG16 | 392 | 44.5  | 6.19 | -0.35 | 42.77 | No  | 81.33 | plastid, soluble        | 37 |           |
| FatB | <i>SiFatB 1-1</i> | LG3  | 386 | 44.18 | 6.20 | -0.55 | 37.65 | Yes | 80.54 | plastid, soluble        | -  | Homodimer |
|      | <i>SiFatB 1-2</i> | LG5  | 424 | 46.60 | 6.28 | -0.30 | 34.05 | Yes | 85.28 | plastid, membrane       | 56 |           |
| FatA | <i>SiFatA</i>     | LG9  | 376 | 42.65 | 8.33 | -0.53 | 50.05 | No  | 79.34 | plastid, soluble        | 52 | Homodimer |
| FAD  | <i>SiFAD2-1</i>   | LG6  | 384 | 44.2  | 8.56 | -0.04 | 37.32 | Yes | 89.79 | ER, membrane            | -  | Monomer   |
|      | <i>SiFAD2-2</i>   | LG4  | 384 | 43.9  | 8.73 | -0.05 | 41.76 | No  | 90.37 | ER, membrane            | -  |           |
|      | <i>SiFAD3</i>     | LG6  | 410 | 46.6  | 8.48 | -0.18 | 30.00 | Yes | 81.52 | ER, membrane            | -  |           |
|      | <i>SiFAD6</i>     | LG5  | 444 | 51.3  | 9.01 | -0.17 | 56.33 | No  | 84.76 | plastid, membrane       | 30 |           |
|      | <i>SiFAD8</i>     | LG7  | 448 | 51.1  | 8.16 | -0.31 | 37.91 | Yes | 87.83 | plastid, membrane       | 72 |           |
|      | <i>SiFAD7</i>     | LG4  | 437 | 49.9  | 7.44 | -0.26 | 36.50 | Yes | 84.68 | plastid, membrane       | 75 |           |
| LACS | <i>SiLACS1</i>    | LG6  | 661 | 74.48 | 6.47 | -0.26 | 32.38 | Yes | 88.61 | ER, membrane            | -  | Monomer   |
|      | <i>SiLACS2</i>    | LG8  | 659 | 73.43 | 6.15 | -0.12 | 36.86 | Yes | 86.24 | ER, membrane            | -  |           |
|      | <i>SiLACS4</i>    | LG1  | 658 | 73.21 | 6.39 | -0.14 | 32.81 | Yes | 88.95 | ER, membrane            | -  |           |
|      | <i>SiLACS6</i>    | LG10 | 697 | 77.05 | 8.05 | -0.05 | 33.63 | Yes | 91.32 | peroxisome, membrane    | -  |           |
|      | <i>SiLACS8</i>    | LG8  | 732 | 80.16 | 8.55 | -0.06 | 27.05 | Yes | 92.73 | ER, membrane            | -  |           |
|      | <i>SiLACS9</i>    | LG2  | 695 | 75.64 | 6.81 | 0.01  | 28.37 | Yes | 97.37 | ER, membrane            | 24 |           |
| GPAT | <i>SiGPAT1</i>    | LG2  | 455 | 50.23 | 6.09 | -0.22 | 51.22 | No  | 83.21 | plastid, soluble        | 52 | Monomer   |
|      | <i>SiGPAT2</i>    | LG6  | 547 | 61.21 | 9.26 | 0.18  | 35.62 | Yes | 97.28 | mitochondrion, membrane |    |           |

|       |                   |      |     |        |      |       |       |     |        |                         |    |         |
|-------|-------------------|------|-----|--------|------|-------|-------|-----|--------|-------------------------|----|---------|
|       | <i>SiGPAT3</i>    | LG11 | 534 | 61.18  | 8.86 | 0.07  | 42.70 | No  | 94.34  | mitochondrion, membrane | 26 |         |
|       | <i>SiGPAT4</i>    | LG5  | 521 | 59.81  | 9.63 | 0.06  | 43.66 | No  | 98.02  | mitochondrion, membrane | -  |         |
|       | <i>SiGPAT5</i>    | LG8  | 371 | 42.27  | 9.20 | -0.10 | 48.74 | No  | 94.53  | ER, membrane            | -  |         |
|       | <i>SiGPAT6</i>    | LG10 | 371 | 42.94  | 9.05 | -0.12 | 48.73 | No  | 93.75  | ER, membrane            | -  |         |
|       | <i>SiGPAT7</i>    | LG11 | 447 | 50.80  | 8.86 | 0.14  | 33.99 | Yes | 101.59 | ER, membrane            | -  |         |
|       | <i>SiGPAT8</i>    | LG7  | 501 | 55.68  | 9.10 | 0.20  | 42.10 | No  | 101.96 | ER, membrane            | -  |         |
|       | <i>SiGPAT9</i>    | LG4  | 493 | 54.66  | 9.50 | 0.20  | 37.81 | Yes | 98.84  | ER, membrane            | -  |         |
|       | <i>SiGPAT10</i>   | LG3  | 511 | 56.12  | 9.69 | 0.20  | 36.50 | Yes | 98.04  | ER, membrane*           | -  |         |
|       | <i>SiGPAT11</i>   | LG8  | 500 | 54.78  | 9.07 | 0.24  | 40.82 | No  | 96.14  | peroxisome, membrane*   | -  |         |
|       | <i>SiGPAT12</i>   | LG10 | 509 | 56.40  | 9.08 | 0.17  | 42.24 | No  | 99.96  | plastid, membrane*      | -  |         |
|       | <i>SiGPAT13</i>   | LG1  | 502 | 55.80  | 9.17 | 0.08  | 37.77 | Yes | 100.98 | ER, membrane            | -  |         |
|       | <i>SiGPAT14</i>   | LG11 | 502 | 55.93  | 9.38 | 0.09  | 38.22 | Yes | 100.80 | ER, membrane            | -  |         |
|       | <i>SiGPAT15</i>   | LG5  | 501 | 56.03  | 9.36 | 0.05  | 38.35 | Yes | 98.78  | ER, membrane            | 24 |         |
|       | <i>SiGPAT16</i>   | LG11 | 501 | 55.78  | 9.45 | 0.13  | 31.74 | Yes | 98.78  | ER, membrane            | -  |         |
|       | <i>SiGPAT17</i>   | LG15 | 510 | 56.16  | 9.42 | 0.14  | 36.14 | Yes | 95.43  | peroxisome, membrane    | -  |         |
| LPAAT | <i>SiLPAAT1</i>   | LG7  | 541 | 59.53  | 9.27 | -0.05 | 48.68 | No  | 86.69  | plastid, membrane       | 72 | Monomer |
|       | <i>SiLPAAT2-1</i> | LG4  | 381 | 42.64  | 9.63 | 0.25  | 46.15 | No  | 110.55 | ER, membrane            | -  |         |
|       | <i>SiLPAAT2-2</i> | LG5  | 386 | 43.61  | 9.69 | 0.23  | 42.72 | No  | 107.10 | ER, membrane            | -  |         |
|       | <i>SiLPAAT3</i>   | LG6  | 377 | 42.80  | 9.04 | 0.42  | 45.18 | No  | 121.27 | ER, membrane            | -  |         |
|       | <i>SiLPAAT4</i>   | LG3  | 350 | 40.52  | 8.86 | 0.24  | 43.08 | No  | 103.49 | ER, membrane            | -  |         |
|       | <i>SiLPAAT5</i>   | LG8  | 369 | 42.74  | 8.64 | 0.15  | 42.18 | No  | 94.23  | ER, membrane            | -  |         |
|       | <i>SiLPAAT6</i>   | LG12 | 316 | 35.62  | 9.69 | -0.14 | 38.72 | Yes | 91.30  | ER, membrane            | -  |         |
| PAH   | <i>SiPAH1-1</i>   | LG5  | 910 | 100.66 | 4.66 | -0.52 | 43.35 | No  | 76.87  | nucleus, membrane*      | -  | Monomer |

|      |                 |      |      |        |      |       |       |    |        |                            |    |           |
|------|-----------------|------|------|--------|------|-------|-------|----|--------|----------------------------|----|-----------|
|      | <i>SiPAH1-2</i> | LG11 | 857  | 94.97  | 4.60 | -0.57 | 41.10 | No | 73.09  | nucleus, membrane*         | -  |           |
|      | <i>SiPAH2</i>   | LG7  | 1004 | 110.47 | 5.58 | -0.43 | 46.46 | No | 77.65  | golgi apparatus, membrane* | -  |           |
| DGAT | <i>SiDGAT1</i>  | LG11 | 543  | 61.94  | 8.06 | 0.20  | 42.38 | No | 99.04  | ER, membrane               | 48 | Homodimer |
|      | <i>SiDGAT2</i>  | LG14 | 335  | 37.48  | 9.42 | 0.26  | 45.99 | No | 104.69 | ER, membrane               | -  | Monomer   |
|      | <i>SiDGAT3</i>  | LG8  | 392  | 42.16  | 8.59 | -0.39 | 65.78 | No | 73.88  | plastid, soluble           | 91 | Homodimer |

\*Likelihood for Localization is lower than 0.5; ER: Endoplasmic reticulum.
